# Supplementary material for: Identification of parameters needed for optimal anaerobic co-digestion of chicken manure and corn stover
Source: Royal Society of Chemistry journal article supplement (doi:10.1039/c9ra05556h), 2019-01-01
Supplement: c9ra05556h1.pdf [file c9ra05556h1.pdf]

## Supporting Information

### Identification of parameters needed for optimal anaerobic co-digestion of chicken manure and corn stover

Yilong Yan,<sup>a</sup> Ziwen Du,<sup>\*,a</sup> Liqui Zhang,<sup>\*,a</sup> Li Feng,<sup>a</sup> Dezhi Sun,<sup>a</sup> Yan Dang,<sup>a</sup> Dawn E. Holmes,<sup>b</sup> and Jessica A. Smith<sup>c</sup>

<sup>a</sup> Beijing Key Laboratory for Source Control Technology of Water Pollution, Engineering Research Center for Water Pollution Source Control and Eco-remediation, College of Environmental Science & Engineering, Beijing Forestry University, 35 Tsinghua East Road, Beijing 100083, China.

<sup>b</sup> Department of Physical and Biological Sciences, Western New England University, 1215 Wilbraham Road, Springfield, Massachusetts 01119, United States

<sup>c</sup> Department of Biomolecular Sciences, Central Connecticut State University, 1615 Stanley Street, New Britain, CT 06050, USA

Corresponding author:

E-mail: [zhangliqiu@163.com](mailto:zhangliqiu@163.com); [zhangliqiu@bjfu.edu.cn](mailto:zhangliqiu@bjfu.edu.cn) (L. Zhang).

**Number of pages: 3**

**Number of Tables: 1** (Page S2)

**Number of Figures: 1** (Page S3)

**Table S1** Characterization of substrates and inoculum.

| Parameter              | Chicken manure | Corn stover | Inoculum |
|------------------------|----------------|-------------|----------|
| TS (%) <sup>a</sup>    | 25.05±0.6      | 94.4±0.2    | 9.9±0.1  |
| VS (%) <sup>a</sup>    | 20.5±0.7       | 92.5±0.2    | 5.0±0.2  |
| VS/TS (%)              | 81.8±0.9       | 98.0±0.5    | 50.9±1.8 |
| C (%) <sup>b</sup>     | 35.5±0.7       | 43.5±0.8    | 32.1±0.7 |
| N (%) <sup>b</sup>     | 3.6±0.5        | 0.81±0.1    | 2.8±0.5  |
| C/N                    | 9.9±1.4        | 53.7±8      | 11.8±1.4 |
| pH                     | 8.8±0.3        | ND          | 8.2±0.3  |
| Total alkalinity (g    | 10.2±0.6       | ND          | 8.0±0.6  |
| CaCO <sub>3</sub> /kg) | 8.8±0.6        | ND          | 10.5±0.7 |
| EC (mS/cm)             |                |             |          |

ND: not determined. EC: electrical conductivity.

<sup>a</sup>Based on wet weight.

<sup>b</sup>Based on dry weight

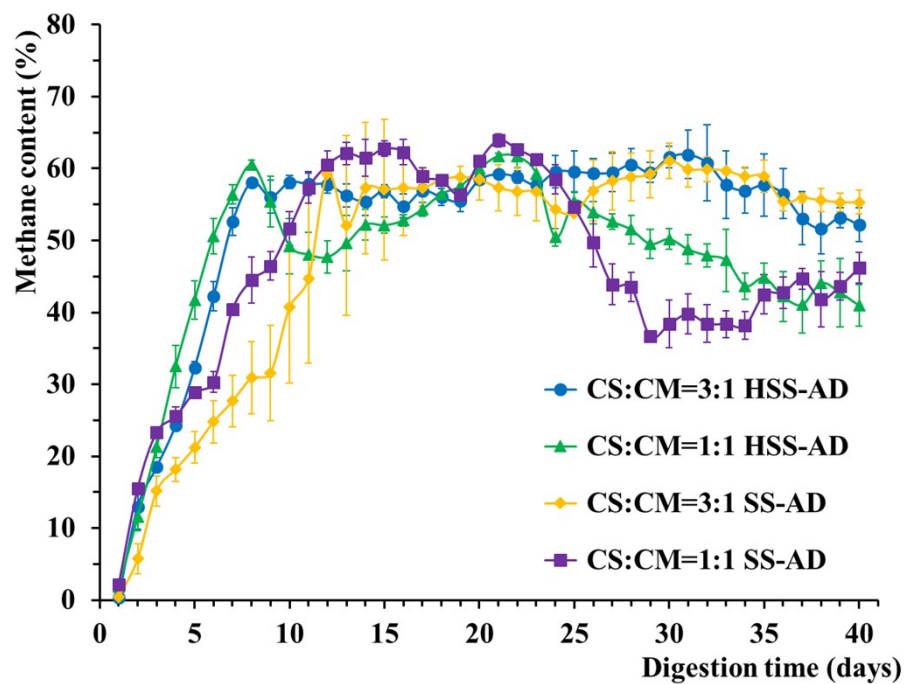

**Figure S1** Daily methane content of biogas in digesters containing different mixture ratios and ISCs. Error bars represent standard deviations from triplicate samples.
